# 1 Individual genotype but not phenotype predicts river migration 2 success in Atlantic salmon

3

4 Paolo Moccetti<sup>1,2,3</sup>, Jonathan D. Bolland<sup>2</sup>, Colin E. Adams<sup>4</sup>, Jessica R. Rodger<sup>5</sup>, Hannele M.  
5 Honkanen<sup>4</sup>, Matthew Newton<sup>4</sup>, Angus J. Lothian<sup>5</sup>, Andy D. Nunn<sup>2</sup>, Domino A. Joyce<sup>1</sup>

6

7 <sup>1</sup> Evolutionary and Ecological Genomics Group, School of Natural Sciences, University of  
8 Hull, UK

9 <sup>2</sup> Hull International Fisheries Institute, School of Natural Sciences, University of Hull, UK

10 <sup>3</sup> Energy and Environment Institute, University of Hull, UK

11 <sup>4</sup> Scottish Centre for Ecology and the Natural Environment, School of Biodiversity One Health  
12 & Veterinary Medicine, University of Glasgow, UK

13 <sup>5</sup> Atlantic Salmon Trust Fellow, Scottish Centre for Ecology and the Natural Environment,  
14 School of Biodiversity One Health & Veterinary Medicine, University of Glasgow, UK

15

16 Author for correspondence:

17 Paolo Moccetti<sup>1,2,3</sup>

18 School of Natural Sciences, University of Hull

19 Cottingham Road, Hull, HU6 7RX, UK

20 Email address: [p.m.moccetti-2019@hull.ac.uk](mailto:p.m.moccetti-2019@hull.ac.uk), [moccetti.paolo@gmail.com](mailto:moccetti.paolo@gmail.com)

21

## 22 ORCID

23

24 PM, 0000-0002-3257-7993; JDB, 0000-0001-7326-5075; CEA, 0000-0003-2470-9754; JRR,  
25 0000-0003-1913-6533; HMH, 0000-0003-0157-4359; AJL, 0000-0002-4121-3817; ADN,  
26 0000-0001-8370-1221; DAJ, 0000-0002-4253-5623

27

28 **Keywords:** Animal migration; salmon; SNPs; genome scan; Geometric morphometrics;  
29 telemetry

30

31

## 32 **Abstract**

33

34 Migratory species typically undertake demanding long-distance journeys, across different  
35 habitat types during which they are exposed to multiple natural and anthropogenic stressors.  
36 Mortality during migration is typically high, and may be exacerbated by human-induced  
37 pressures. Understanding individual responses to these selection pressures is rarely attempted,  
38 because of the challenges of relating individual phenotypic and genetic data to migration  
39 success. Here we show distinct Single Nucleotide Polymorphism (SNP) sets significantly  
40 differentiated between Atlantic salmon smolts making successful migrations to sea and those  
41 that failed to migrate, in two different rivers. In contrast, morphological variation was not  
42 diagnostic of migration success. Populations from each river were genetically distinct, and  
43 while different genes were possibly implicated in migration success in each river, they related  
44 to common biological processes (for example osmoregulation and immune and stress  
45 response). Given that migration failure should quickly purge polymorphism at selected SNPs  
46 from a population, the question of how genetic diversity in these populations is maintained is  
47 an important one. Standing genetic variation could be maintained by different life history  
48 strategies and/or environmentally driven balancing selection. Our work highlights the  
49 importance of preserving genetic diversity to ensure evolutionary resilience at the population  
50 level, and has practical implications for management.

51

## 52 **Introduction**

53

54 Animal migration has evolved independently many times across the Animal Kingdom (Dingle  
55 & Drake, 2007; Bowlin et al., 2010; Shaw, 2016). Migration events can involve large numbers  
56 of individuals moving between different habitats and regions, and these events play a key  
57 ecological and socio-economic role in natural and human communities (Bauer & Hoyer, 2014).  
58 Migratory species typically rely on multiple habitats to complete their life cycle and often  
59 undertake demanding long-distance journeys exposing themselves to numerous natural and  
60 anthropogenic stressors, such as predation, adverse weather conditions, pathogens, pollution,  
61 artificial constructions and harvesting (Alerstam, Hedenström & Åkesson, 2003). Mortality  
62 during migration is typically high and can be exacerbated by human-induced pressures, such  
63 that it impacts upon migratory populations and the ecosystems that depend on them (Wilcove  
64 & Wikelski, 2008; Harris et al., 2009; Middleton et al., 2013; Klaassen et al., 2014; Baker et  
65 al., 2020). With an ongoing global decline of migratory species (Wilcove & Wikelski, 2008),  
66 a better understanding of the factors causing mortality in migration is urgently required to  
67 predict responses of migratory populations to future environmental challenges and implement  
68 incisive conservation actions.

69 Recent advances in telemetry technology have made it possible to investigate migratory  
70 behaviours of species both temporally and spatially (Doherty et al., 2017; Thorup et al., 2023).  
71 This has enabled a better understanding of the exogenous factors directly influencing migration  
72 mortality (Thorstad et al., 2013; Hays et al., 2003; Palacín et al., 2017; Weinz et al., 2020).  
73 Organisms require a suite of specific morphological, physiological and behavioural adaptive  
74 features to successfully complete a migratory cycle (Justen & Delmore, 2022). Given the  
75 phenotypic and genetic variation found in most populations, it is reasonable to expect that some  
76 genetic or phenotypic traits are more likely to increase migration success than others. However  
77 which traits these might be remains poorly understood.

78 Genomic tools have recently been applied to identify factors regulating migratory behaviour at  
79 the population or species level. Several studies have discovered the genetic basis for migratory  
80 features such as migration timing and distance, orientation and propensity to migrate, with

81 specific genomic regions linked to these traits (Zhu et al., 2009; Liedvogel, Åkesson & Bensch,  
82 2011; Hecht et al., 2012; O'Malley et al., 2013; Hess et al., 2014; Hecht et al., 2015; Pritchard  
83 et al., 2018; Waples, Naish & Primmer, 2020; Justen & Delmore, 2022). However,  
84 understanding the genomic basis on which selection could act at an individual level to dictate  
85 migration success has rarely been attempted (but see Bourret, Dionne & Bernatchez, 2014),  
86 despite the fundamental insights it could provide into how populations might respond to  
87 selection, and the implications for management of conservation genetics of migratory species.  
88 An important phenotypic trait expected to influence migration success is body morphology  
89 (Minias et al., 2013). Morphological variation (i.e. body shape and size) can affect behaviour,  
90 resource use, survival and reproductive success of individuals (Wainwright 1994; Skulason &  
91 Smith, 1995; Fruciano, Tigano & Ferrito, 2011). The effect of morphology on movement is  
92 particularly evident in fish because of a direct link to swimming performance (Pakkasmaa &  
93 Piironen, 2000; Fisher & Hogan, 2007; Drinan et al., 2012; Stelkens et al., 2012; Páez &  
94 Dodson, 2017). Chapman et al. (2015) found a direct correlation between migration propensity  
95 and body shape, while other studies have demonstrated an increased ability and 'motivation'  
96 to pass river barriers in relation to size, fat content and morphology (Newton et al., 2018;  
97 Lothian et al., 2020; Goerig et al., 2020). Nevertheless, research on migration survival and  
98 mortality as a consequence of body shape variation (as opposed to size; Kennedy, Gale &  
99 Ostrand, 2007; Hostetter et al., 2012; Romer et al., 2013; Furey et al., 2016; Lilly et al., 2022)  
100 is still lacking.

101 Atlantic salmon (*Salmo salar* Linnaeus) is a migratory species of socio-economic importance  
102 that has suffered substantial declines over the past 40 years (ICES, 2021) due to multiple abiotic  
103 and biotic factors not yet fully understood (Forseth et al., 2017; Dadswell et al., 2022). The  
104 Atlantic salmon has a complex life cycle, which includes two long distance migration stages;  
105 a long-distance feeding migration from freshwater to sea as a juvenile (smolt) and an adult  
106 returning spawning migration from sea to freshwater. In addition it is a philopatric species,  
107 accurately homing to its natal spawning grounds (Thorstad et al., 2010). Fidelity to a specific  
108 river limits gene flow among populations and has been shown to promote the evolution of local  
109 adaptation through natural selection, genetic drift, and bottlenecks (Garcia De Leaniz et al., 2007;  
110 Fraser et al., 2011). The seaward migration of smolts constitutes a key life-stage for Atlantic  
111 salmon and provides an ideal opportunity to study the genetic and phenotypic components that  
112 may differentially affect the ability of individual animals to successfully complete their  
113 migration. The identification of genetic and phenotypic traits could play a vital role in local  
114 management of Atlantic salmon (Bernos, Jeffries & Mandrak, 2020).

115  
116 Here, we analysed genomic and morphological data of migrating Atlantic salmon smolts in  
117 two rivers. We wanted to test to what extent (I) Atlantic salmon populations in the two rivers  
118 were genetically distinct, and (II) migration success by seaward migrating smolts could be  
119 predicted by specific genomic regions and/or morphological traits.

120

## 121 **Methods**

122

### 123 **Sampling, tagging and study design**

124

125 The study reported here formed part of a wider acoustic telemetry study to examine migratory  
126 behaviours and migration success in juvenile salmon (smolts) on their first migration from natal  
127 rivers to sea (see Whelan, Roberts & Gray, 2019). Atlantic salmon were captured between 11  
128 April and 3 May 2019 from the rivers Oykel (57°59.640' N, 4°48.282' W) and Spey (57°24.960'  
129 N, 3°22.602' W), Scotland, using 1.5 m diameter rotary screw traps and a box trap (Fig. 1).

130 Fish were anaesthetised in MS222 and tagged with Vemco V7-2L acoustic transmitters (7mm  
131 diameter, 19.5mm length, 1.5g in air, 137 dB re 1 $\mu$ Pa @ 1m, acoustic transmission repeat cycle  
132 of 28 seconds  $\pm$  10 seconds, InnovaSea, Bedford, Nova Scotia, Canada). For more details on  
133 the tagging and release procedure see Lilly et al. (2022). Before being tagged, fish were  
134 measured (fork length, mm), weighed (g), and photographed. Photographs of the left side of  
135 each fish were taken from approximately 30 cm directly above the fish, with a Fujifilm FinePix  
136 XP130 Compact Digital Camera on a background reference scale. An adipose fin-clip was also  
137 taken from every fish and stored in 96% ethanol for later DNA extraction.

138 Two acoustic monitoring receivers (InnovaSea VR2Tx) were deployed in each river, one of  
139 which was immediately downstream of the tagging site (0.2 and 0.6 km in the rivers Oykel and  
140 Spey, respectively; Fig. 1). The second receiver was deployed at the river mouth (Fig. 1). Of  
141 all the salmon tagged and released in the two rivers (Oykel,  $n = 149$ , Spey  $n = 150$ ), 91.9 and  
142 96.7% respectively were detected by the first receiver after release. Of these, 78 (Oykel) and  
143 82 (Spey) smolts were randomly selected for this study, distributed evenly between migratory  
144 outcomes ensuring a balanced design. Fish from both rivers were allocated into two groups  
145 based on their migratory outcome; 1) fish detected on the second and final river receiver were  
146 categorised as ‘successful’ river migrants, and 2) fish only detected on the first receiver were  
147 considered as ‘unsuccessful’ river migrants (Table 1, Fig. 1). To assess receiver detection  
148 efficiency, additional receivers deployed as a part of the broader telemetry study in the marine  
149 coastal waters of the Moray Firth were used. Since all smolts detected in marine waters were  
150 also detected by the two freshwater receivers, detection efficiency was determined to be 100%,  
151 meaning that no fish were wrongly miscategorised as unsuccessful migrants as a result of  
152 missed detections at the second river receiver.

153 To assess whether the study rivers harboured genetically differentiated Atlantic salmon  
154 populations, the genetic variation across rivers in the Moray Firth (Fig. 1) was investigated. In  
155 addition to fish from the study rivers Oykel and Spey, Atlantic salmon smolts from the rivers  
156 Findhorn ( $n = 3$ ; 57°25.05' N, 3°53.35' W), Deveron ( $n = 4$ ; 57°30.45' N, 2°42.35' W) and  
157 Ness ( $n = 4$ ; 57°27.17' N, 4°15.35' W) were included in the analysis. To further contextualise  
158 the relative genetic diversity of these rivers, Atlantic salmon samples from the River Ure,  
159 England ( $n = 76$ ; 54°16.19' N, 1°44.57' W) were also included in the analysis (Fig. 1). Fish  
160 from the Findhorn, Deveron and Ness were sampled in Spring 2019 using rotary screw traps,  
161 while fish from the Ure were captured employing backpack electric fishing equipment  
162 (Electracatch 24 V DC input, 200-400 V, 100 W, 50 Hz Pulsed DC, variable pulse width  
163 output).

164

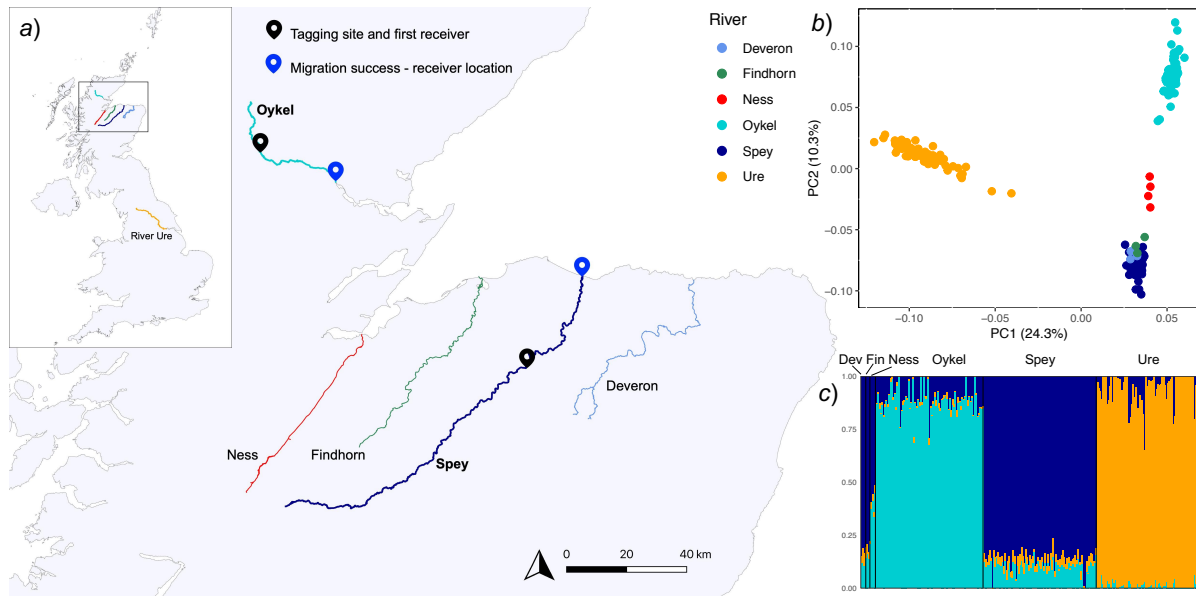

165  
 166 **Figure 1.** The study area (a) and genetic structuring (b, c) of salmon populations from rivers flowing  
 167 into the Moray Firth (Scotland), with samples from the River Ure (England, a) top left panel) for  
 168 comparison. Tagging locations and acoustic receivers are shown in map (a). The principal components  
 169 analysis (PCA) and the ADMIXTURE analysis plots are based on 44,504 SNPs pruned for linkage  
 170 disequilibrium. In the PCA scatterplot (b), dots represent individual fish, and variance (%) explained  
 171 by the first and second axes are shown. Colours correspond to rivers. In the ADMIXTURE plot (K=3;  
 172 c) each fish individual is represented by a vertical bar. ‘Dev’ and ‘Fin’ are abbreviations for the rivers  
 173 Deveron and Findhorn, respectively.

174  
 175

176 **Table 1.** Classification of smolts (*n*) in the rivers Oykel and Spey based on tracking results.

| River | Unsuccessful | Successful | Total river migration |  |
|-------|--------------|------------|-----------------------|--|
|       |              |            | distance              |  |
| Oykel | 36           | 42         | 30.5 km               |  |
| Spey  | 35           | 47         | 50.1 km               |  |

177  
 178  
 179  
 180

## 179 Genomic analyses

### 181 *DNA extraction, genotyping and quality control*

182 DNA was extracted from adipose fin samples employing a modified Mu-DNA: Tissue protocol  
 183 (Sellers et al., 2018) using a solid phase reversible immobilization (SPRI) magnetic bead  
 184 capture method (adapted from Rohland & Reich, 2012) to isolate high molecular weight DNA.  
 185 The DNA samples were sent to the Centre for Integrative Genetics (CIGENE, Ås, Norway) for  
 186 genotyping, including biological and technical replicates to ensure consistency across plates.  
 187 A custom 220,000 SNP (Single Nucleotide Polymorphism) Affymetrix Axiom array designed  
 188 for Atlantic salmon (see Barson et al., 2015 for details) was used for data generation. Following  
 189 the manufacturer’s instructions, only SNPs categorised as PolyHighResolution and  
 190 NoMinorHom were used for analyses, while SNPs with unknown position were excluded from  
 191 the dataset, leaving 213,945 available loci for genomic investigation. We then performed  
 192 quality control (QC) and filtering of SNPs data in PLINK version 1.9 and 2.0 ([www.cog-  
 193 genomics.org/plink/1.9/](http://www.cog-genomics.org/plink/1.9/) and [www.cog-  
 genomics.org/plink/2.0/](http://www.cog-genomics.org/plink/2.0/); Purcell et al., 2007; Chang et

194 al., 2015). SNPs were filtered for Hardy-Weinberg equilibrium (PLINK 1.9. command: `--hwe`  
195 `0.001`) to remove genotyping errors. Additionally, SNPs were screened for minor allele  
196 frequency (`--maf 0.05`) and genotype missingness (`--geno 0.1`), and individuals with a high rate  
197 of missing SNPs (`--mind 0.1`) were discarded from analyses. Full siblings were also removed  
198 using PLINK 2.0 (`--king-cutoff 0.25`). In the migration success analyses, these QC steps were  
199 performed separately for the rivers Oykel and Spey and resulted in the retention of 198,336  
200 SNPs and 82 individual fish from the River Oykel and 201,475 SNPs and 78 individuals from  
201 the River Spey. The fish used in this analysis were the same employed for morphometric  
202 investigations, but included two additional individuals which were not photographed. For the  
203 regional population structure analyses (paragraph below), QC was performed on all rivers  
204 together and SNPs in high linkage disequilibrium were pruned in PLINK 1.9 (`--indep 50 5 1.4`)  
205 leaving 44,504 unlinked SNPs available for analysis.

206

### 207 *Regional rivers genetic structuring*

208 To investigate the genetic variation across rivers in the Moray Firth (Fig. 1), a principal  
209 component analysis (PCA) was performed in PLINK 1.9 using individuals from the rivers  
210 Oykel, Spey, Findhorn, Deveron, Ness and Ure. Using the same samples, ADMIXTURE v.1.3.  
211 (Alexander, Novembre & Lange, 2009) was used to infer the most likely number of genetic  
212 clusters (K, testing from K=1 to K=6), that was determined based on the lowest cross-validation  
213 error.

214

### 215 *Outlier analysis and gene annotation*

216 To detect SNP markers with unusually high levels of allelic differentiation between successful  
217 and unsuccessful migrants in each river, two different approaches were computed using the  
218 unpruned SNP dataset. In the first approach, the R (R Core Team, 2022) package ‘OutFLANK’  
219 v. 0.2 (Whitlock & Lotterhos, 2015), which estimates among-groups  $F_{st}$  for each locus was  
220 used. For the second, the allele-based chi-squared association test in PLINK 1.9 (command: `--`  
221 `assoc`) was implemented. See code (<https://tinyurl.com/salmon-migration-success>) for details  
222 about parameters used to run these analyses. Outlier loci in ‘OutFLANK’ were identified by  
223 applying a q-value < 0.05 threshold, while outliers in the association test in PLINK were  
224 determined as the top 0.1% SNPs ranked by P-values. Acknowledging the inherent risk of false  
225 positives in genome scan analyses (Luu, Bazin & Blum, 2017), a robust bootstrapping  
226 methodology was employed. For each river, 200 bootstrap replicate datasets were generated  
227 by randomly removing one fish from each of the migratory groups (successful and  
228 unsuccessful). Each of these datasets was examined independently, with 100 analysed using  
229 ‘OutFLANK’ and the other 100 using the PLINK association test. Only the outliers that were  
230 consistently detected in all 200 bootstrap replicates by both methods were retained for  
231 subsequent analysis. Outliers were visualised using the ‘qqman’ v. 0.1.8 R package (Turner,  
232 2014). A PCA of the outliers was computed in PLINK on the complete dataset including all  
233 fish and the resulting PCA plot was employed to visually test if these outlier SNPs effectively  
234 separated successful and unsuccessful migrating salmon smolts in the two rivers.

235 For each river, the ten genes closest to each outlier SNP were extracted using the *closest*  
236 function in the software bedtools 2.29.1 (Quinlan & Hall, 2010) and the genes within 10 kb  
237 upstream and downstream of outlier SNPs were filtered in R (Wellband et al., 2019). The  
238 potential functions of these genes were assessed by examining the gene ontology (GO)  
239 biological process terms associated with each gene, using the R package ‘Ssa.RefSeq.db’ v.  
240 1.2 (Grammes, 2016) and literature searches. For these analyses, the NCBI *Salmo salar*  
241 Annotation Release 100 (ICSASG\_v2) was used as a reference genome.

242

243 **Morphometric analyses**

244

245 *Landmark digitisation*

246 Fish morphology was analysed using length (mm), weight (g), Fulton’s condition factor (K;  
247 Nash, Valencia & Geffen, 2006) and geometric morphometrics (GM). The GM analyses were  
248 based on photographs of 158 salmon (Spey  $n = 77$ , Oykel  $n = 81$ ). The images of each fish were  
249 imported into tpsUtil v. 1.78 (Rohlf, 2019) and randomly shuffled using the *Randomly order*  
250 *specimens* function so that the operator was blind to the river-of-origin of the specimens. Nine  
251 fixed and 4 semi- landmarks (Fig. 2) were digitised on each image by a single operator using  
252 tpsDig v. 2.31 (Rohlf, 2017) using a subset of landmarks from the scheme proposed by  
253 Moccetti et al. (2023). Furthermore, five linear body measurements (Fig. 2) used as proxy of  
254 body slenderness which has been associated to swimming ability were also included (e.g.,  
255 Pakkasmaa & Piironen, 2001; Drinan et al., 2012). Landmark coordinates were imported into  
256 R and analysed using the ‘geomorph’ and ‘RRPP’ v. 4.0.4 packages (Adams et al., 2021; Baken  
257 et al., 2021; Collyer & Adams, 2021). Preliminary analysis revealed body bending as a major  
258 source of shape variation in the dataset. This was corrected by employing landmarks 1, 14, 15  
259 and 11 (see Moccetti et al., 2023 for details). All subsequent analyses were performed on  
260 landmarks 1-13 only. PCA plots were produced with the ‘ggplot2’ package (Wickham, 2016).  
261

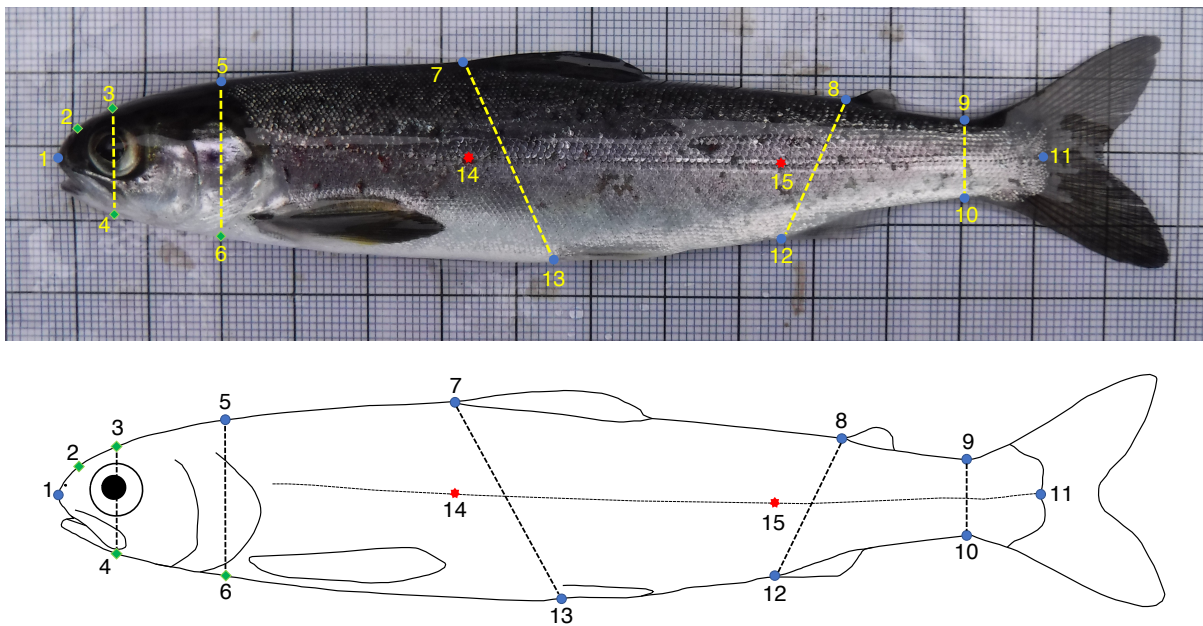

262

263 **Figure 2.** Fixed (blue circles) and semi (green diamonds) landmarks and linear measurements used for  
264 the geometric morphometrics analyses of Atlantic salmon smolts (image modified from Moccetti et al,  
265 2023). Landmarks 14 and 15 (red stars) were used to correct for body arching. **(1)** Tip of snout; **(2)**  
266 Midpoint between 1 and 3; **(3)** Directly above middle of eye; **(4)** Perpendicular to 3; **(5)** Dorsal surface  
267 posterior of cranium; **(6)** Perpendicular to 11; **(7)** Anterior insertion point of dorsal fin; **(8)** Anterior  
268 insertion point of adipose fin; **(9)** Dorsal insertion point of caudal fin; **(10)** Versal insertion point of  
269 caudal fin; **(11)** Posterior midpoint of hypural plate; **(12)** Anterior insertion point of anal fin; **(13)**  
270 Anterior insertion point of ventral fin; **(14)** Lateral line - perpendicular to 7; **(15)** Lateral line -  
271 perpendicular to 12.

272

273 The following analyses were performed separately for each river. First, we tested whether  
274 successful and unsuccessful migrating fish in the two rivers were different in length (mm),  
275 weight (g) or Fulton’s condition factor using *t*- and *Mann-Whitney U*- tests depending on the  
276 data distribution. Fulton’s condition factor (K) was calculated as:  $K = 100 \times W.L^{-3}$ , where  $W =$

277 weight (g) and  $L$  = length (cm). We next tested for a difference in body shape between  
278 successful and unsuccessful fish, and whether these differences were consistent across rivers.  
279 A generalised Procrustes analysis (GPA) was performed to remove effects not related to body  
280 shape through translation, scaling and rotation of the landmark configurations (Rohlf & Slice,  
281 1990). The residual effect of fish size on body shape was tested using Procrustes ANOVAs,  
282 with Procrustes coordinates used as a response variable and log centroid size used as an  
283 independent variable with a randomised residual permutation procedure (10,000 iterations). No  
284 significant effect of size on shape was found in either river ( $p > 0.05$ ). To visualise body shape  
285 of successful and unsuccessful fish, a PCA was performed on the Procrustes-aligned  
286 coordinates of fish of each migration category from each river. Procrustes ANOVAs and  $t$ -tests  
287 were subsequently used to test for differences in body shape and linear distances between fish  
288 with different migratory outcomes. For linear distance and length, weight and condition factor  
289 comparisons, significance values were Bonferroni corrected to limit the increased error rate  
290 correlated with multiple testing (Rice, 1989).

291  
292  
293

## 294 **Results**

295

### 296 **Genomic analyses**

297

#### 298 *Regional rivers genetic structuring*

299 The study rivers Spey and Oykel were genetically differentiated from one another (Fig. 1). The  
300 second Principal Component (PC2) successfully separated the fish from the River Ness,  
301 geographically located between the Oykel and the Spey, from all the other rivers (Fig. 1). Fish  
302 from the rivers Deveron and Findhorn clustered with the spatially adjacent River Spey (Fig. 1).  
303 PC1 separated the more geographically distant River Ure, situated in northern England, from  
304 all Scottish rivers flowing into the Moray Firth (Fig. 1). Similarly, ADMIXTURE analysis  
305 identified three different genetic clusters consisting of the rivers Oykel, Spey and Ure, with the  
306 rivers Deveron, Findhorn clustering with the Spey, while the Ness was admixed with the rivers  
307 Oykel and Spey.

308

#### 309 *Genomic regions linked to migratory outcome*

310 There was a consistently high false discovery rate (FDR) observed across methods and  
311 bootstrap replicates in both rivers. On average, only 11.7% of outlier SNPs were detected by  
312 'OutFLANK' or PLINK in all 100 replicates. Specifically, the FDR was 10.8% ('OutFLANK')  
313 and 10.7% (PLINK) in the Oykel dataset and 14.4% ('OutFLANK') and 10.7% (PLINK) in  
314 the Spey. Seventy outlier SNPs were consistently detected by both methods in all bootstrap  
315 replicates for migrating fish in the River Oykel, and 67 outliers for fish from the River Spey  
316 (Supplementary files 1, 2). None of the outlier SNPs were found in fish from both rivers. The  
317 PCA computed on this subset of outlier loci confirmed their ability to distinguish between  
318 successful and unsuccessful fish along PC1 axis for each river (Fig. 3).

319



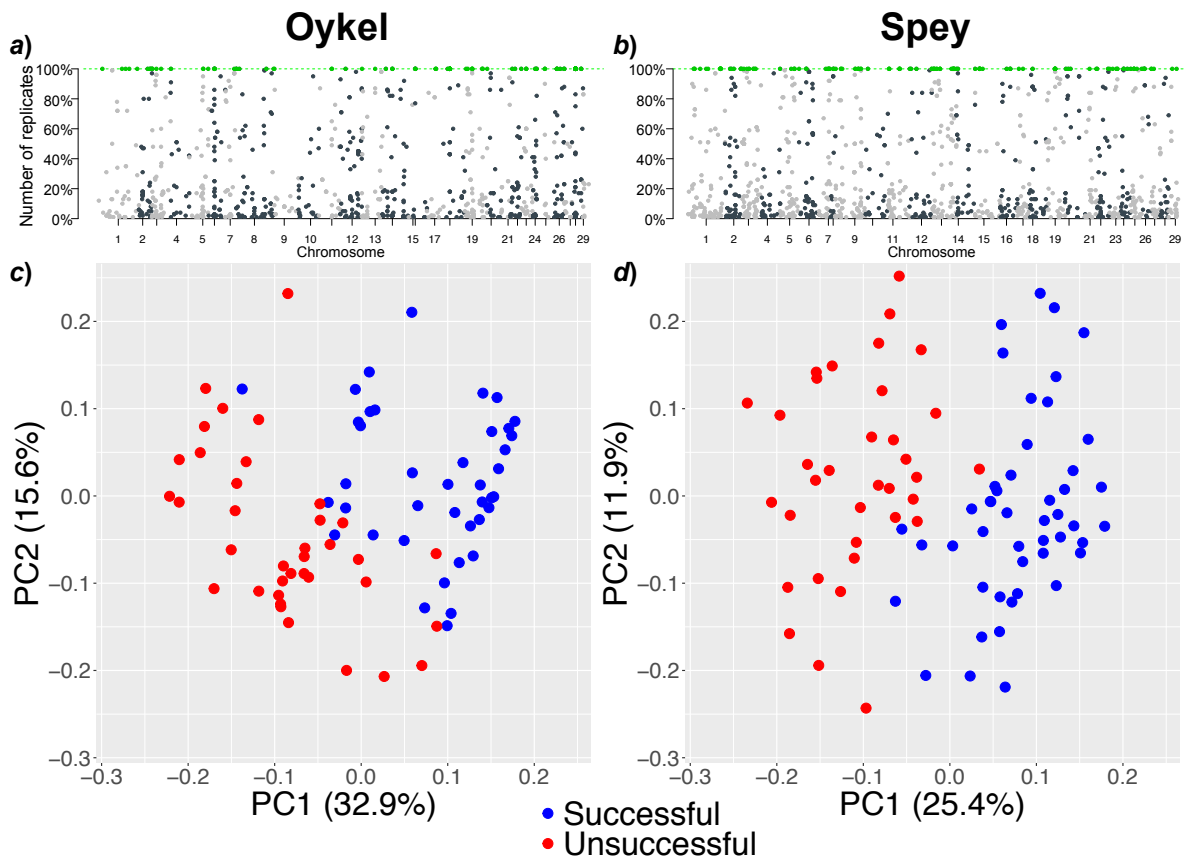

320  
 321  
 322  
 323  
 324  
 325  
 326  
 327  
 328  
 329  
 330

**Figure 3.** The Manhattan-style plots (*a*, *b*) show all outlier SNPs (dots) identified in bootstrap replicated datasets using ‘OutFLANK’ in each river. The outliers consistently detected in 100% of replicates and used for analysis are highlighted in green. The y-axis shows the proportion of replicated datasets where each individual outlier SNP was identified. The x-axis displays the position of the SNPs along the genome with chromosome numbers. The analogous plots for the association test in PLINK are shown in Supplementary Figure 1. *c* and *d*; Principal components analysis scatterplots based on 70 (Oykel) and 67 (Spey) outlier SNPs between successful (blue) and unsuccessful (red) migrant Atlantic salmon smolts. Each dot represents an individual fish. Variance (%) explained by the first and second axes is also shown.

331  
 332

### Gene annotation

333  
 334  
 335  
 336  
 337  
 338  
 339  
 340

There were 50 and 48 putative coding regions (hereafter genes) within 10 kb of the outlier SNPs’ locations in the Oykel and Spey fish, respectively (Supplementary file 3). None of these genes were identified as outliers in fish from both rivers. Eight and 12 genes contained more than one outlier SNP within the 10kb region in the Oykel and Spey samples, respectively (Supplementary file 3). The two genes enclosing the highest number of outlier SNPs were the *anion exchange protein 2-like* (encompassing 18 SNPs, River Oykel) and the *collagen alpha-1(I) chain-like* (encompassing 10 SNPs, River Spey).

341

### Morphological differences between successful and unsuccessful salmon

342  
 343  
 344  
 345  
 346  
 347

There were no differences in length, weight or Fulton’s condition factor between successful and unsuccessful migrating smolts ( $p > 0.07$ ; Supplementary Figure 2, Supplementary Tables 1, 2). Procrustes ANOVAs based on the 13 landmark coordinates did not show significant differences in body shape between successful and unsuccessful smolts in either of the two

348 rivers ( $p > 0.31$ ; Fig. 4, Supplementary Table 3). Likewise, after Bonferroni correction (new  
349  $\alpha$  value = 0.005), comparison of body linear measurements did not show any significant  
350 difference between migrating groups ( $p > 0.04$ ; Supplementary Tables 4, 5).  
351

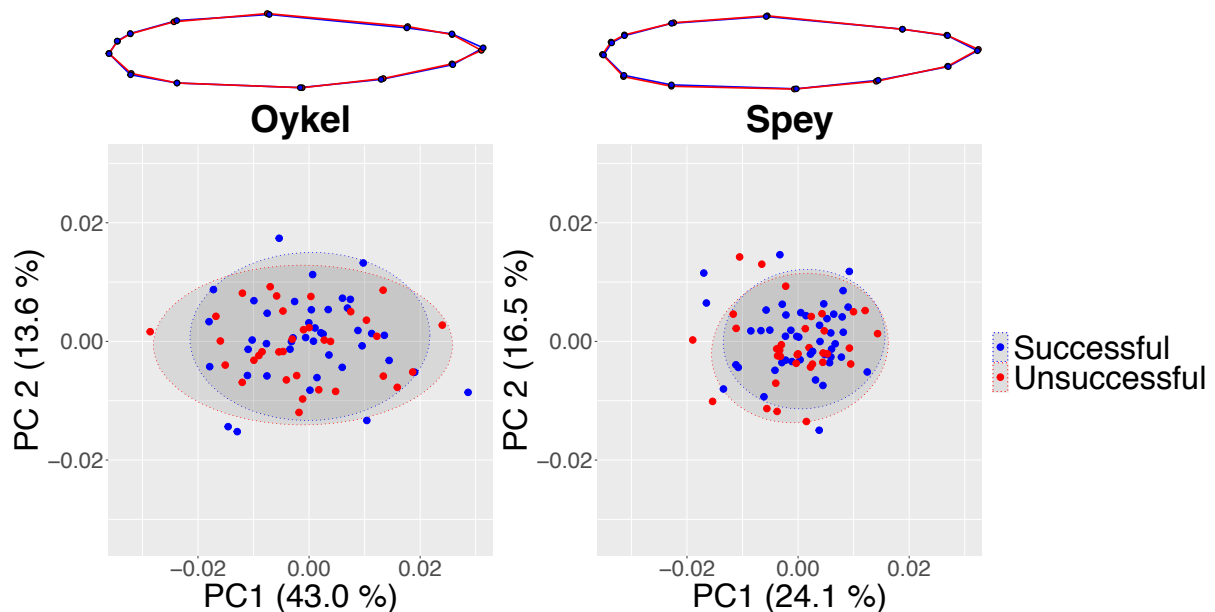

352  
353 **Figure 4.** Mean body shape projections (top) and principal components analysis scatterplots (lower  
354 panel) show an absence of shape difference between the migratory groups. Procrustes-aligned  
355 coordinates of successful (blue) and unsuccessful (red) Atlantic salmon, where dots represent individual  
356 fish are shown below. Variance (%) explained by the first and second axes and 95% confidence ellipses  
357 are displayed. Projections show a complete overlap of the blue (successful) and red (unsuccessful) lines  
358 in both rivers despite magnifying morphological differences three times to aid visualisation.  
359  
360

## 361 Discussion

362  
363 Our work shows that distinct SNP sets were significantly differentiated between Atlantic  
364 salmon smolts making successful migrations to sea and those that failed to migrate to sea in  
365 two different rivers. In both rivers, the outlier SNPs predicting individual migration success  
366 were near several genes that could be relevant for migration, but we found no evidence of  
367 phenotypic differences in body shape between successful and unsuccessful Atlantic salmon  
368 river migrants.

369 Categorising genes containing outlier SNPs by biological function highlighted similar  
370 processes across the study rivers. In fish from both rivers, genes putatively linked to  
371 osmoregulation, immunity, stress, and nervous, sensory, muscular, skeletal and cardiovascular  
372 system development and activity were detected.

373 Candidate genes linked to general neuronal, cardiovascular and skeletal functions may play an  
374 important role in migration, but a direct link to smolt migration success is hard to determine.  
375 Furthermore, given the susceptibility of gene annotation to false positives, it is important to  
376 exercise caution when attempting to establish such correlations (Pavlidis et al., 2012).  
377 Nevertheless, osmoregulation and immune response are processes shown to play an important  
378 part in salmonid migration. In the Oykel and in the Spey outlier SNPs were located within or  
379 near (within 10 kb) several candidate osmoregulatory genes. These genes were associated with  
380 a range of processes including ion transmembrane and water transport, renal activity, response  
381 to salt stress and hyperosmotic response. Noteworthy it is the identification of the *anion*

382 *exchange protein 2-like* gene, encompassing 18 of the 70 outlier SNPs detected in the Oykel.  
383 This gene is associated to GO terms involved in osmoregulatory processes, such as chloride  
384 and bicarbonate transmembrane transport (Wilson, Wilson & Grosell, 2002; Grosell, 2006).  
385 Osmoregulation and individual ability to undergo physiological changes required for seawater  
386 entry has been shown to be important to increase chances of survival and predator avoidance  
387 in seaward migrating salmonid smolts (Kennedy, Gale & Ostrand, 2007) and could play a role  
388 in migration success of Atlantic salmon smolts in the last tidal kilometres of the Oykel and  
389 Spey where transitional zone between freshwater and saltwater occurs.

390 Immunity related and stress response genes were also widely detected in association with the  
391 outlier SNPs separating successful and unsuccessful river migrants in fish from both the Oykel  
392 and Spey. Studies using proteomics in Pacific salmon (*Oncorhynchus* spp.) have found  
393 significant correlation between migratory outcome, expression of specific immune-related  
394 genes and viral and parasite-induced infection burden (Miller et al., 2011; Jeffries et al., 2014;  
395 Furey et al., 2021; Mauduit et al., 2022). The stress hormone cortisol has also been found to be  
396 a good predictor of migration success in salmonids (Birnie-Gauvin et al., 2019). Our findings  
397 now highlight the potentially important role of pathogens driven selection in Atlantic salmon  
398 migration success. An additional factor that requires further investigation, is the possibility that  
399 there are individual differences in response to the tagging process, since there are also immune  
400 genes annotated with GO terms involved in blood coagulation and response to wounding. To  
401 determine migration patterns, all the fish in our study were tagged, so although this is not a  
402 confounding factor in our design, this finding warrants further investigation.

403 While particular SNP sets allow us to predict migratory outcome of Atlantic salmon smolts in  
404 the Oykel and Spey, analyses of length, weight, body condition and body shape did not find  
405 any significant difference between successful and unsuccessful migrants in either of the rivers.  
406 This is somewhat surprising given the importance that morphology plays in swimming  
407 performance in fish (Webb, 1978; Webb, 1984; Fisher & Hogan, 2007; Langerhans & Reznick,  
408 2010; Assumpção et al., 2012), the specific hydrodynamic characteristics required to  
409 effectively migrate in running waters (Langerhans & Reznick, 2010; Brodersen et al., 2014),  
410 and that size, body shape and condition may also be important in anti-predatory behaviour  
411 (Domenici et al., 2007). However, we did find a difference in smolt morphology between rivers  
412 (Mocchetti et al., 2023) and there is genetic differentiation of the Oykel and Spey salmon  
413 populations indicating reproductive isolation between these geographically close populations,  
414 likely facilitated by fine-scale homing. Different evolutionary and demographic histories,  
415 (evidenced by the geographic structure we find between river populations) combined with  
416 different contemporary ecological selection pressures will therefore lead to different traits  
417 being linked to migration success. For example, there were no genes that contained outlier  
418 SNPs nor GO processes in common in Atlantic salmon from both the Oykel and Spey.

419 Overall, we found that migratory outcome for individual salmon smolts in given rivers, in a  
420 given year, could be predicted from a subset of SNPs consistently detected through  
421 bootstrapping approach. We next need to understand the ecological and environmental factors  
422 which could determine those subsets, by adding temporal replication so that we can better  
423 understand the limits of our study. From an evolutionary and conservation point of view, the  
424 mechanism through which the observed genetic diversity could be maintained needs to be  
425 identified, given that migration failure should theoretically quickly purge polymorphism at  
426 selected SNPs from a population. We propose that variation in life history could maintain  
427 standing genetic variation for environmentally driven balancing selection (Mérot et al., 2020).  
428 ‘Partial’ migration (Shaw, 2016), where only a portion of the population migrates, is common  
429 in several taxa and may be responsible for maintaining high genetic diversity if migratory and  
430 resident individuals interbreed (Pulido, 2011). Within-population differences in migratory  
431 strategies (e.g. timing, duration and routes) between age-classes and sexes are also well known

432 phenomena (Cristol, Baker & Carbone, 1999). These sub-groups are exposed to different biotic  
433 and abiotic conditions potentially selecting for different genotypes that may maintain the gene  
434 pool diversity within the population (Dingle & Drake, 2007; Wittmann et al., 2017; Briedis &  
435 Bauer, 2018). Alternative migratory and reproductive tactics are well documented in Atlantic  
436 salmon (Fleming, 1998; Thorstad et al., 2010; Birnie-Gauvin, Thorstad & Aarestrup, 2019),  
437 thus individuals with different life histories experiencing temporally and spatially fluctuating  
438 selection can interbreed and induce genetic mixing. Typically, the life history of Atlantic  
439 salmon involves seaward migration followed by a return to their natal river to spawn, but a  
440 number of males (and occasionally females, Birnie-Gauvin, Thorstad & Aarestrup, 2019)  
441 become sexually reproductive in freshwater as morphological juveniles before migrating to sea  
442 ('precocious male parr'; Lepais et al., 2017). Their contribution to paternity could be substantial  
443 (ca. 60% in one study, Saura et al., 2008). The number of years spent in freshwater before  
444 smolting, and at sea before upstream spawning migration can also vary considerably (Thorstad  
445 et al., 2010). Finally, unlike Pacific salmon species, a non-negligible proportion of Atlantic  
446 salmon survive reproduction (especially females), return to the ocean as 'kelt' and spawn  
447 multiple times (Hedger et al., 2009). Weather and ecological conditions can change  
448 dramatically among and within years inducing different selective pressures on migrating smolts  
449 and other salmon life stages. For instance, variations in water discharge and temperature may  
450 affect ecological factors such as migration timing (Thorstad et al., 2010), predation (Kennedy,  
451 Gale & Ostrand, 2007; Hostetter et al., 2012) and pathogen infection (Wagner et al., 2005) as  
452 well as passage of artificial migration barriers (Marschall et al., 2011). Clearly, all these  
453 variables may differentially alter the allele frequencies under selection and help maintain  
454 standing genetic variation. Straying between rivers could also be a source of genetic diversity  
455 (Palstra, O'Connell & Ruzzante, 2007; Keefer & Caudill, 2014), although we found no  
456 evidence of this in our study.  
457 From a conservation point of view, understanding and predicting these selection pressures  
458 could be invaluable in managing existing populations, and could inform stock selection where  
459 hatchery-reared individuals are used to augment populations (Jepsen, Nielsen & Deacon, 2003;  
460 Koed et al., 2020; Waples, Naish & Primmer, 2020).  
461 Overall, our findings show that migration success could be linked to specific genotypes and  
462 highlight the importance of preserving genetic diversity for conservation, to allow populations  
463 to respond to potential heterogeneity between years, and the increased variability that long-  
464 term climate change may produce. Our next challenge is to understand in detail the selection  
465 pressures and associated genetic changes in populations facilitating conservation success and  
466 ensuring a future for these iconic species.  
467  
468

## 469 **Acknowledgments**

470 We would like to thank the Spey Fisheries Board and the Kyle of Sutherland Fisheries Trust  
471 for their help and support with this project. We would also like to thank Jonathan Archer,  
472 Georgios Kyriakou, Fraser Brydon, Jessica Whitney, Mustafa Soganci and Rowan Smith for  
473 their help collecting the data for this study.  
474

## 475 **Funding**

476 This research was part of the Missing Salmon Project funded by the Atlantic Salmon Trust.  
477 PM was supported by the Leeds-York-Hull Natural Environment Research Council (NERC)  
478 Doctoral Training Partnership (DTP) Panorama under grant NE/S007458/1.  
479

## 480 **Ethics**

481 For fish samples from the rivers Oykel, Spey, Deveron, Findhorn and Ness, the care and use  
482 of experimental animals complied with the UK Home Office animal welfare laws, guidelines  
483 and policies (UK Home Office Licence PPL 70/8794) and was approved by the University of  
484 Glasgow Animal Welfare and Ethics Review Board (AWERB). Atlantic salmon from the River  
485 Ure were treated in compliance with the UK ASPA (1986) Home Office project licence number  
486 PD6C17B56.  
487

## 488 **Competing interests**

489 The authors declare that they have no competing interests.  
490

## 491 **References**

- 492
- 493 Adams DC, Collyer M, Kaliontzopoulou A, Baken E. 2021. “Geomorph: Software for  
494 geometric morphometric analyses. R package version 4.0.2.” [https://cran.r-](https://cran.r-project.org/package=geomorph)  
495 [project.org/package=geomorph](https://cran.r-project.org/package=geomorph).
- 496 Alerstam T, Hedenström A, Åkesson S. 2003. Long-distance migration: evolution and  
497 determinants. *Oikos* 103:247–260. DOI: [https://doi.org/10.1034/j.1600-](https://doi.org/10.1034/j.1600-0706.2003.12559.x)  
498 [0706.2003.12559.x](https://doi.org/10.1034/j.1600-0706.2003.12559.x).
- 499 Alexander DH, Novembre J, Lange K. 2009. Fast model-based estimation of ancestry in  
500 unrelated individuals. *Genome Research* 19:1655–1664. DOI: 10.1101/gr.094052.109.
- 501 Assumpção L de, Makrakis MC, Makrakis S, Wagner RL, Silva PS da, Lima AF de,  
502 Kashiwaqui EAL. 2012. The use of morphometric analysis to predict the swimming  
503 efficiency of two Neotropical long-distance migratory species in fish passage.  
504 *Neotropical Ichthyology* 10. DOI: <https://doi.org/10.1590/S1679-62252012000400012>
- 505 Baken EK, Collyer ML, Kaliontzopoulou A, Adams DC. 2021. geomorph v4.0 and gmShiny:  
506 Enhanced analytics and a new graphical interface for a comprehensive morphometric  
507 experience. *Methods in Ecology and Evolution* 12:2355–2363. DOI:  
508 <https://doi.org/10.1111/2041-210X.13723>.
- 509 Baker NJ, Boubée J, Lokman PM, Bolland JD. 2020. Evaluating the impact of hydropower  
510 on downstream migrating anguillid eels: Catchment-wide and fine-scale approaches to  
511 identify cost-effective solutions. *Science of The Total Environment* 748:141111. DOI:  
512 <https://doi.org/10.1016/j.scitotenv.2020.141111>.
- 513 Barson NJ, Aykanat T, Hindar K, Baranski M, Bolstad GH, Fiske P, Jacq C, Jensen AJ,  
514 Johnston SE, Karlsson S, Kent M, Moen T, Niemelä E, Nome T, Næsje TF, Orell P,  
515 Romakkaniemi A, Sægrov H, Urdal K, Erkinaro J, Lien S, Primmer CR. 2015. Sex-  
516 dependent dominance at a single locus maintains variation in age at maturity in salmon.  
517 *Nature* 528:405–408. DOI: 10.1038/nature16062.
- 518 Bauer S, Hoyer BJ. 2014. Migratory animals couple biodiversity and ecosystem functioning  
519 worldwide. *Science* 344. DOI: 10.1126/science.1242552.
- 520 Bernos TA, Jeffries KM, Mandrak NE. 2020. Linking genomics and fish conservation  
521 decision making: a review. *Reviews in Fish Biology and Fisheries* 30:587–604. DOI:  
522 [10.1007/s11160-020-09618-8](https://doi.org/10.1007/s11160-020-09618-8).
- 523 Birnie-Gauvin K, Thorstad EB, Aarestrup K. 2019. Overlooked aspects of the *Salmo salar*  
524 and *Salmo trutta* lifecycles. *Reviews in Fish Biology and Fisheries* 29:749–766. DOI:  
525 [10.1007/s11160-019-09575-x](https://doi.org/10.1007/s11160-019-09575-x).
- 526 Birnie-Gauvin K, Flávio H, Kristensen ML, Walton-Rabideau S, Cooke SJ, Willmore WG,

527 Koed A, Aarestrup K. 2019. Cortisol predicts migration timing and success in both  
528 Atlantic salmon and sea trout kelts. *Scientific Reports* 9:2422. DOI: 10.1038/s41598-  
529 019-39153-x.

530 Bourret V, Dionne M, Bernatchez L. 2014. Detecting genotypic changes associated with  
531 selective mortality at sea in Atlantic salmon: polygenic multilocus analysis surpasses  
532 genome scan. *Molecular Ecology* 23:4444–4457. DOI:  
533 <https://doi.org/10.1111/mec.12798>.

534 Bowlin MS, Bisson IA, Shamoun-Baranes J, Reichard JD, Sapir N, Marra PP, Kunz TH,  
535 Wilcove DS, Hedenström A, Guglielmo CG, Åkesson S, Ramenofsky M, Wikelski M.  
536 2010. Grand challenges in migration biology. *Integrative and Comparative Biology*  
537 50:261–279. DOI: 10.1093/icb/icq013.

538 Briedis M, Bauer S. 2018. Migratory connectivity in the context of differential migration.  
539 *Biology Letters* 14:20180679. DOI: 10.1098/rsbl.2018.0679.

540 Brodersen J, Chapman BB, Nilsson PA, Skov C, Hansson LA, Brönmark C. 2014. Fixed and  
541 flexible: Coexistence of obligate and facultative migratory strategies in a freshwater  
542 fish. *PLoS ONE* 9 : e90294. DOI: 10.1371/journal.pone.0090294.

543 Chang CC, Chow CC, Tellier LCAM, Vattikuti S, Purcell SM, Lee JJ. 2015. Second-  
544 generation PLINK: rising to the challenge of larger and richer datasets. *GigaScience*  
545 4:s13742-015-0047–8. DOI: 10.1186/s13742-015-0047-8.

546 Chapman BB, Hulthén K, Brönmark C, Nilsson PA, Skov C, Hansson L-A, Brodersen J.  
547 2015. Shape up or ship out: migratory behaviour predicts morphology across spatial  
548 scale in a freshwater fish. *Journal of Animal Ecology* 84:1187–1193. DOI:  
549 <https://doi.org/10.1111/1365-2656.12374>.

550 Collyer ML, Adams DC. 2021. “RRPP: Linear Model Evaluation with Randomized  
551 Residuals in a Permutation Procedure, R package version 1.1.2.” [https://cran.r-](https://cran.r-project.org/package=RRPP)  
552 [project.org/package=RRPP](https://cran.r-project.org/package=RRPP).

553 Cristol DA, Baker MB, Carbone C. 1999. Differential Migration Revisited: latitudinal  
554 segregation by age and sex class. In: *Current Ornithology*. Nolan V, Ketterson ED,  
555 Thompson CF. (Eds). Springer US, Boston, MA. Pp. 33–88. DOI: 10.1007/978-1-4757-  
556 4901-4\_2.

557 Dadswell M, Spares A, Reader J, McLean M, McDermott T, Samways K, Lilly J. 2022. The  
558 Decline and Impending Collapse of the Atlantic Salmon (*Salmo salar*) Population in the  
559 North Atlantic Ocean: A Review of Possible Causes. *Reviews in Fisheries Science &*  
560 *Aquaculture* 30:215–258. DOI: 10.1080/23308249.2021.1937044.

561 Dingle H, Drake VA. 2007. What Is Migration? *BioScience* 57:113–121. DOI:  
562 10.1641/b570206.

563 Doherty PD, Baxter JM, Gell FR, Godley BJ, Graham RT, Hall G, Hall J, Hawkes LA,  
564 Henderson SM, Johnson L, Speedie C, Witt MJ. 2017. Long-term satellite tracking  
565 reveals variable seasonal migration strategies of basking sharks in the north-east  
566 Atlantic. *Scientific Reports* 7:42837. DOI: 10.1038/srep42837.

567 Domenici P, Turesson H, Brodersen J, Brönmark C. 2007. Predator-induced morphology  
568 enhances escape locomotion in crucian carp. *Proceedings of the Royal Society B:*  
569 *Biological Sciences* 275:195–201. DOI: 10.1098/rspb.2007.1088.

570 Drinan TJ, McGinnity P, Coughlan JP, Cross TF, Harrison SSC. 2012. Morphological  
571 variability of Atlantic salmon *Salmo salar* and brown trout *Salmo trutta* in different river  
572 environments. *Ecology of Freshwater Fish* 21:420–432. DOI: 10.1111/j.1600-  
573 0633.2012.00561.x.

574 Fisher R, Hogan JD. 2007. Morphological predictors of swimming speed: a case study of pre-  
575 settlement juvenile coral reef fishes. *Journal of Experimental Biology* 210:2436–2443.  
576 DOI: 10.1242/jeb.004275.

577 Fleming IA. 1998. Pattern and variability in the breeding system of Atlantic salmon (*Salmo*  
578 *salar*), with comparisons to other salmonids. *Canadian Journal of Fisheries and Aquatic*  
579 *Sciences* 55:59–76. DOI: 10.1139/d98-009.

580 Forseth T, Barlaup BT, Finstad B, Fiske P, Gjøsæter H, Falkegård M, Hindar A, Mo TA,  
581 Rikardsen AH, Thorstad EB, Vøllestad LA, Wennevik V. 2017. The major threats to  
582 Atlantic salmon in Norway. *ICES Journal of Marine Science* 74:1496–1513. DOI:  
583 10.1093/icesjms/fsx020.

584 Fraser DJ, Weir LK, Bernatchez L, Hansen MM, Taylor EB. 2011. Extent and scale of local  
585 adaptation in salmonid fishes: review and meta-analysis. *Heredity* 106:404–420. DOI:  
586 10.1038/hdy.2010.167.

587 Fruciano C, Tiganò C, Ferrito V. 2011. Geographical and morphological variation within and  
588 between colour phases in *Coris julis* (L. 1758), a protogynous marine fish. *Biological*  
589 *Journal of the Linnean Society* 104:148–162. DOI: 10.1111/j.1095-8312.2011.01700.x.

590 Furey NB, Bass AL, Miller KM, Li S, Lotto AG, Healy SJ, Drenner SM, Hinch SG. 2021.  
591 Infected juvenile salmon can experience increased predation during freshwater  
592 migration. *Royal Society Open Science* 8:201522. DOI: 10.1098/rsos.201522.

593 Furey NB, Hinch SG, Bass AL, Middleton CT, Minke-Martin V, Lotto AG. 2016. Predator  
594 swamping reduces predation risk during nocturnal migration of juvenile salmon in a  
595 high-mortality landscape. *Journal of Animal Ecology* 85:948–959. DOI:  
596 <https://doi.org/10.1111/1365-2656.12528>

597 Garcia De Leaniz C, Fleming IA, Einum S, Verspoor E, Jordan WC, Consuegra S, Aubin-  
598 Horth N, Lajus D, Letcher BH, Youngson AF, Webb JH, Vøllestad LA, Villanueva B,  
599 Ferguson A, Quinn TP. 2007. A critical review of adaptive genetic variation in Atlantic  
600 salmon: Implications for conservation. *Biological Reviews* 82:173–211. DOI:  
601 10.1111/j.1469-185X.2006.00004.x.

602 Goerig E, Wasserman BA, Castro-Santos T, Palkovacs EP. 2020. Body shape is related to the  
603 attempt rate and passage success of brook trout at in-stream barriers. *Journal of Applied*  
604 *Ecology* 57:91–100. DOI: 10.1111/1365-2664.13497.

605 Grammes, F. 2016. Ssa.RefSeq.db: Annotation package for the *Salmo salar* RefSeq  
606 (ICSASG\_v2). <https://rdrr.io/github/FabianGrammes/Ssa.RefSeq.db/>

607 Grosell M. 2006. Intestinal anion exchange in marine fish osmoregulation. *Journal of*  
608 *Experimental Biology* 209:2813–2827. DOI: 10.1242/jeb.02345.

609 Harris G, Thirgood S, Hopcraft JGC, Cromsigt JPGM, Berger J. 2009. Global decline in  
610 aggregated migrations of large terrestrial mammals. *Endangered Species Research*  
611 7:55–76. DOI: <https://doi.org/10.3354/esr00173>.

612 Hays GC, Broderick AC, Godley BJ, Luschi P. 2003. Satellite telemetry suggests high levels  
613 of fishing-induced mortality in marine turtles. *Marine Ecology Progress Series*  
614 262:305–309. DOI: 10.3354/meps262305.

615 Hecht BC, Hard JJ, Thrower FP, Nichols KM. 2015. Quantitative genetics of migration-  
616 related traits in rainbow and steelhead trout. *G3: Genes, Genomes, Genetics* 5:873–889.  
617 DOI: 10.1534/g3.114.016469.

618 Hecht BC, Thrower FP, Hale MC, Miller MR, Nichols KM. 2012. Genetic Architecture of  
619 Migration-Related Traits in Rainbow and Steelhead Trout, *Oncorhynchus mykiss*. *G3*  
620 *Genes|Genomes|Genetics* 2:1113–1127. DOI: 10.1534/g3.112.003137.

621 Hess JE, Caudill CC, Keefer ML, McIlraith BJ, Moser ML, Narum SR. 2014. Genes predict  
622 long distance migration and large body size in a migratory fish, Pacific lamprey.  
623 *Evolutionary Applications* 7:1192–1208. DOI: <https://doi.org/10.1111/eva.12203>.

624 Hostetter NJ, Evans AF, Roby DD, Collis K. 2012. Susceptibility of Juvenile Steelhead to  
625 Avian Predation: the Influence of Individual Fish Characteristics and River Conditions.  
626 *Transactions of the American Fisheries Society* 141:1586–1599. DOI:

627 10.1080/00028487.2012.716011.

628 ICES. 2021. Working Group on North Atlantic Salmon (WGNAS). ICES Scientific Reports.  
629 3:29. <https://doi.org/10.17895/ices.pub.7923>

630 Jeffries KM, Hinch SG, Gale MK, Clark TD, Lotto AG, Casselman MT, Li S, Rechisky EL,  
631 Porter AD, Welch DW, Miller KM. 2014. Immune response genes and pathogen  
632 presence predict migration survival in wild salmon smolts. *Molecular Ecology* 23:5803–  
633 5815. DOI: <https://doi.org/10.1111/mec.12980>.

634 Jepsen N, Nielsen EE, Deacon M. 2003. Linking individual migratory behaviour of Atlantic  
635 salmon to their genetic origin. In: *Aquatic telemetry: advances and applications.*  
636 *Proceedings of the Fifth Conference on Fish Telemetry held in Europe, Ustica, Italy* (pp.  
637 9-13).

638 Justen H, Delmore KE. 2022. The genetics of bird migration. *Current Biology* 32:R1144–  
639 R1149. DOI: <https://doi.org/10.1016/j.cub.2022.07.008>.

640 Keefer ML, Caudill CC. 2014. Homing and straying by anadromous salmonids: a review of  
641 mechanisms and rates. *Reviews in Fish Biology and Fisheries* 24:333–368. DOI:  
642 10.1007/s11160-013-9334-6.

643 Kennedy BM, Gale WL, Ostrand KG. 2007. Relationship between smolt gill Na<sup>+</sup>, K<sup>+</sup>  
644 ATPase activity and migration timing to avian predation risk of steelhead trout  
645 (*Oncorhynchus mykiss*) in a large estuary. *Canadian Journal of Fisheries and Aquatic*  
646 *Sciences* 64:1506–1516. DOI: 10.1139/f07-117.

647 Klaassen RHG, Hake M, Strandberg R, Koks BJ, Trierweiler C, Exo K-M, Bairlein F,  
648 Alerstam T. 2014. When and where does mortality occur in migratory birds? Direct  
649 evidence from long-term satellite tracking of raptors. *Journal of Animal Ecology*  
650 83:176–184. DOI: <https://doi.org/10.1111/1365-2656.12135>.

651 Koed A, Birnie-Gauvin K, Sivebæk F, Aarestrup K. 2020. From endangered to sustainable:  
652 Multi-faceted management in rivers and coasts improves Atlantic salmon (*Salmo salar*)  
653 populations in Denmark. *Fisheries Management and Ecology* 27:64–76. DOI:  
654 <https://doi.org/10.1111/fme.12385>.

655 Langerhans RB, Reznick DN. 2010. Ecology and evolution of swimming performance in  
656 fishes: predicting evolution with biomechanics. In: *Fish locomotion: an eco- ethological*  
657 *perspective*. Domenici O, Kapoor BG. (Eds.). Science Publisher, Enfield, New  
658 Hampshire. Pp. 200-248.

659 Lepais O, Manicki A, Glise S, Buoro M, Bardonnnet A. 2017. Genetic architecture of  
660 threshold reaction norms for male alternative reproductive tactics in Atlantic salmon  
661 (*Salmo salar* L.). *Scientific Reports* 7:1–13. DOI: 10.1038/srep43552.

662 Liedvogel M, Åkesson S, Bensch S. 2011. The genetics of migration on the move. *Trends in*  
663 *Ecology & Evolution* 26:561–569. DOI: <https://doi.org/10.1016/j.tree.2011.07.009>.

664 Lilly J, Honkanen HM, McCallum JM, Newton M, Bailey DM, Adams CE. 2022. Combining  
665 acoustic telemetry with a mechanistic model to investigate characteristics unique to  
666 successful Atlantic salmon smolt migrants through a standing body of water.  
667 *Environmental Biology of Fishes* 105:2045–2063. DOI: 10.1007/s10641-021-01172-x.

668 Lothian AJ, Schwinn M, Anton AH, Adams CE, Newton M, Koed A, Lucas MC. 2020. Are  
669 we designing fishways for diversity? Potential selection on alternative phenotypes  
670 resulting from differential passage in brown trout. *Journal of Environmental*  
671 *Management* 262:110317. DOI: 10.1016/j.jenvman.2020.110317.

672 Luu K, Bazin E, Blum MGB. 2017. pcadapt: an R package to perform genome scans for  
673 selection based on principal component analysis. *Molecular Ecology Resources* 17:67–  
674 77. DOI: <https://doi.org/10.1111/1755-0998.12592>.

675 Marschall EA, Mather ME, Parrish DL, Allison GW, McMenemy JR. 2011. Migration delays  
676 caused by anthropogenic barriers: modeling dams, temperature, and success of



677 migrating salmon smolts. *Ecological Applications* 21:3014–3031. DOI:  
678 <https://doi.org/10.1890/10-0593.1>.

679 Mauduit F, Segarra A, Mandic M, Todgham AE, Baerwald MR, Schreier AD, Fangue NA,  
680 Connon RE. 2022. Understanding risks and consequences of pathogen infections on the  
681 physiological performance of outmigrating Chinook salmon. *Conservation Physiology*  
682 10:coab102. DOI: 10.1093/conphys/coab102.

683 Mérot C, Llaurens V, Normandeau E, Bernatchez L, Wellenreuther M. 2020. Balancing  
684 selection via life-history trade-offs maintains an inversion polymorphism in a seaweed  
685 fly. *Nature Communications* 11:670. DOI: 10.1038/s41467-020-14479-7.

686 Middleton AD, Kauffman MJ, McWhirter DE, Cook JG, Cook RC, Nelson AA, Jimenez  
687 MD, Klaver RW. 2013. Animal migration amid shifting patterns of phenology and  
688 predation: lessons from a Yellowstone elk herd. *Ecology* 94:1245–1256. DOI:  
689 <https://doi.org/10.1890/11-2298.1>.

690 Miller KM, Li S, Kaukinen KH, Ginther N, Hammil E, Curtis JMR, Patterson DA,  
691 Sierocinski T, Donnison L, Pavlidis P, Hinch SG, Hruska KA, Cooke SJ, English KK,  
692 Farrell AP. 2011. Genomic signatures predict migration and spawning failure in wild  
693 canadian salmon. *Science* 331:214–217. DOI: 10.1126/science.1196901.

694 Minias P, Kaczmarek K, Włodarczyk R, Janiszewski T. 2013. Wing Shape Influences  
695 Stopover Strategies in a Migratory Shorebird, The Common Snipe. *The Condor*  
696 115:535–542. DOI: 10.1525/cond.2013.120137.

697 Moccetti P, Rodger JR, Bolland JD, Kaiser-Wilks P, Smith R, Nunn AD, Adams CE, Bright  
698 JA, Honkanen HM, Lothian AJ, Newton M, Joyce DA. 2023. Is shape in the eye of the  
699 beholder? Assessing landmarking error in geometric morphometric analyses on live fish.  
700 *PeerJ* 11:e15545. DOI: 10.7717/peerj.15545.

701 Nash RDM, Valencia AH, Geffen AJ. 2006. The origin of Fulton’s condition factor - setting  
702 the record straight. *Fisheries* 31:236–238.

703 Newton M, Dodd JA, Barry J, Boylan P, Adams CE. 2018. The impact of a small-scale  
704 riverine obstacle on the upstream migration of Atlantic Salmon. *Hydrobiologia*  
705 806:251–264. DOI: 10.1007/s10750-017-3364-3.

706 O’Malley KG, Jacobson DP, Kurth R, Dill AJ, Banks MA. 2013. Adaptive genetic markers  
707 discriminate migratory runs of Chinook salmon (*Oncorhynchus tshawytscha*) amid  
708 continued gene flow. *Evolutionary Applications* 6:1184–1194. DOI:  
709 <https://doi.org/10.1111/eva.12095>.

710 Páez DJ, Dodson JJ. 2017. Environment-specific heritabilities and maternal effects for body  
711 size, morphology and survival in juvenile Atlantic salmon (*Salmo salar*): evidence from  
712 a field experiment. *Environmental Biology of Fishes* 100:209–221. DOI:  
713 10.1007/s10641-016-0572-z.

714 Pakkasmaa S, Piironen J. 2001. Water velocity shapes juvenile salmonids. *Evolutionary*  
715 *Ecology* 14:721–730. DOI: 10.1023/A:1011691810801.

716 Palacín C, Alonso JC, Martín CA, Alonso JA. 2017. Changes in bird-migration patterns  
717 associated with human-induced mortality. *Conservation Biology* 31:106–115. DOI:  
718 <https://doi.org/10.1111/cobi.12758>.

719 Palstra FP, O’Connell MF, Ruzzante DE. 2007. Population structure and gene flow reversals  
720 in Atlantic salmon (*Salmo salar*) over contemporary and long-term temporal scales:  
721 Effects of population size and life history. *Molecular Ecology* 16:4504–4522. DOI:  
722 10.1111/j.1365-294X.2007.03541.x.

723 Pavlidis P, Jensen JD, Stephan W, Stamatakis A. 2012. A Critical Assessment of  
724 Storytelling: Gene Ontology Categories and the Importance of Validating Genomic  
725 Scans. *Molecular Biology and Evolution* 29:3237–3248. DOI: 10.1093/molbev/mss136.

726 Pritchard VL, Mäkinen H, Vähä JP, Erkinaro J, Orell P, Primmer CR. 2018. Genomic

727 signatures of fine-scale local selection in Atlantic salmon suggest involvement of sexual  
728 maturation, energy homeostasis and immune defence-related genes. *Molecular Ecology*  
729 27:2560–2575. DOI: 10.1111/mec.14705.

730 Pulido F. 2011. Evolutionary genetics of partial migration - the threshold model of migration  
731 revis(it)ed. *Oikos* 120:1776–1783. DOI: 10.1111/j.1600-0706.2011.19844.x.

732 Purcell S, Neale B, Todd-Brown K, Thomas L, Ferreira MAR, Bender D, Maller J, Sklar P,  
733 de Bakker PIW, Daly MJ, Sham PC. 2007. PLINK: A Tool Set for Whole-Genome  
734 Association and Population-Based Linkage Analyses. *The American Journal of Human*  
735 *Genetics* 81:559–575. DOI: 10.1086/519795.

736 R Core Team. 2022. R: A language and environment for statistical computing. R Foundation  
737 for Statistical Computing, Vienna, Austria. <https://www.R-project.org/>.

738 Rohlf F. 2017. tpsUtil v. 1.78. Stony Brook, NY: Department of Ecology and Evolution,  
739 State University of New York.

740 Rohlf F. 2019. tpsDig v. 2.31, Stony Brook, NY: Department of Ecology and Evolution, State  
741 University of New York.

742 Quinlan AR, Hall IM. 2010. BEDTools: a flexible suite of utilities for comparing genomic  
743 features. *Bioinformatics* 26:841–842. DOI: 10.1093/bioinformatics/btq033.

744 Hedger RD, Hatin D, Dodson JJ, Martin F, Fournier D, Caron F, Whoriskey FG. 2009.  
745 Migration and swimming depth of Atlantic salmon kelts *Salmo salar* in coastal zone and  
746 marine habitats. *Marine Ecology Progress Series* 392:179–192.

747 Rice WR. 1989. Analyzing Tables of Statistical Tests. *Evolution* 43:223–225. DOI:  
748 10.2307/2409177.

749 Rohland N, Reich D. 2012. Cost-effective, high-throughput DNA sequencing libraries for  
750 multiplexed target capture. *Genome research* 22:939–946. DOI:  
751 10.1101/gr.128124.111.

752 Rohlf FJ, Slice D. 1990. Extensions of the Procrustes Method for the Optimal  
753 Superimposition of Landmarks. *Systematic Biology* 39:40–59. DOI: 10.2307/2992207.

754 Romer JD, Leblanc CA, Clements S, Ferguson JA, Kent ML, Noakes D, Schreck CB. 2013.  
755 Survival and behavior of juvenile steelhead trout (*Oncorhynchus mykiss*) in two  
756 estuaries in Oregon, USA. *Environmental Biology of Fishes* 96:849–863. DOI:  
757 10.1007/s10641-012-0080-8.

758 Saura M, Caballero A, Caballero P, Morán P. 2008. Impact of precocious male parr on the  
759 effective size of a wild population of Atlantic salmon. *Freshwater Biology* 53:2375–  
760 2384. DOI: 10.1111/j.1365-2427.2008.02062.x.

761 Sellers GS, Di Muri C, Gómez A, Hänfling B. 2018. Mu-DNA: a modular universal DNA  
762 extraction method adaptable for a wide range of sample types. *Metabarcoding and*  
763 *Metagenomics* 2:e24556. DOI: <https://doi.org/10.3897/mbmg.2.24556>

764 Shaw AK. 2016. Drivers of animal migration and implications in changing environments.  
765 *Evolutionary Ecology* 30:991–1007. DOI: 10.1007/s10682-016-9860-5.

766 Skulason S, Smith TB. 1995. Resource polymorphisms in vertebrates. *Trends in Ecology &*  
767 *Evolution* 10:366–370. DOI: [https://doi.org/10.1016/S0169-5347\(00\)89135-1](https://doi.org/10.1016/S0169-5347(00)89135-1).

768 Stelkens RB, Jaffuel G, Escher M, Wedekind C. 2012. Genetic and phenotypic population  
769 divergence on a microgeographic scale in brown trout. *Molecular Ecology* 21:2896–  
770 2915. DOI: <https://doi.org/10.1111/j.1365-294X.2012.05581.x>.

771 Thorstad EB, Rikardsen AH, Alp A, Økland F. 2013. The use of electronic tags in fish  
772 research—an overview of fish telemetry methods. *Turkish Journal of Fisheries and*  
773 *Aquatic Sciences* 13:881–896. DOI: 10.4194/1303-2712-v13\_5\_13

774 Thorstad EB, Whoriskey F, Rikardsen AH, Aarestrup K. 2010. Aquatic Nomads: The Life  
775 and Migrations of the Atlantic Salmon. In: *Atlantic Salmon Ecology*. Aas O, Einum S,  
776 Klemetsen A, Skurdal J. (Eds.). Pp. 1–32. Wiley-Blackwell. DOI:

777 <https://doi.org/10.1002/9781444327755.ch1>.

778 Thorup K, Tøttrup AP, Willemoes M, Klaassen RHG, Strandberg R, Vega ML, Dasari HP,  
779 Araújo MB, Wikelski M, Rahbek C. 2023. Resource tracking within and across  
780 continents in long-distance bird migrants. *Science Advances* 3:e1601360. DOI:  
781 10.1126/sciadv.1601360.

782 Turner SD. 2014. qqman: an R package for visualizing GWAS results using Q-Q and  
783 manhattan plots. *bioRxiv*:5165. DOI: 10.1101/005165.

784 Wagner GN, Hinch SG, Kuchel LJ, Lotto A, Jones SRM, Patterson DA, Macdonald JS,  
785 Kraak G Van Der, Shrimpton M, English KK, Larsson S, Cooke SJ, Healey MC, Farrell  
786 AP. 2005. Metabolic rates and swimming performance of adult Fraser River sockeye  
787 salmon (*Oncorhynchus nerka*) after a controlled infection with *Parvicapsula*  
788 *minibicornis*. *Canadian Journal of Fisheries and Aquatic Sciences* 62:2124–2133. DOI:  
789 10.1139/f05-126.

790 Wainwright, PC. 1994. Functional morphology as a tool in ecological research. In:  
791 *Ecological morphology: integrative organismal biology*. Wainwright PC, Reilly SM.  
792 (Eds). Pp. 42–59 University of Chicago Press, Chicago, IL.

793 Waples RS, Naish KA, Primmer CR. 2020. Conservation and Management of Salmon in the  
794 Age of Genomics. *Annual Review of Animal Biosciences* 8:117–143. DOI:  
795 10.1146/annurev-animal-021419-083617.

796 Webb PW. 1978. Fast-Start Performance and Body form In Seven Species of Teleost Fish.  
797 *Journal of Experimental Biology* 74:211–226. DOI: 10.1242/jeb.74.1.211.

798 Webb PW. 1984. Body Form, Locomotion and Foraging in Aquatic Vertebrates. *American*  
799 *Zoologist* 24:107–120. DOI: 10.1093/icb/24.1.107.

800 Weinz AA, Matley JK, Klinard N V, Fisk AT, Colborne SF. 2020. Identification of predation  
801 events in wild fish using novel acoustic transmitters. *Animal Biotelemetry* 8:28. DOI:  
802 10.1186/s40317-020-00215-x.

803 Wellband K, Mérot C, Linnansaari T, Elliott JAK, Curry RA, Bernatchez L. 2019.  
804 Chromosomal fusion and life history-associated genomic variation contribute to within-  
805 river local adaptation of Atlantic salmon. *Molecular Ecology* 28:1439–1459. DOI:  
806 <https://doi.org/10.1111/mec.14965>.

807 Whelan K, Roberts D, Gray J. 2019. The SAMARCH Project International Salmonid Coastal  
808 and Marine Telemetry Workshop. Available at [https://www.samarch.org/wp-](https://www.samarch.org/wp-content/uploads/2020/05/SAMARCH-Tracking-Conference-Nov-2019-final_compressed.pdf)  
809 [content/uploads/2020/05/SAMARCH-Tracking-Conference-Nov-2019-](https://www.samarch.org/wp-content/uploads/2020/05/SAMARCH-Tracking-Conference-Nov-2019-final_compressed.pdf)  
810 [final\\_compressed.pdf](https://www.samarch.org/wp-content/uploads/2020/05/SAMARCH-Tracking-Conference-Nov-2019-final_compressed.pdf) (accessed 15 March 2023).

811 Whitlock MC, Lotterhos KE. 2015. Reliable Detection of Loci Responsible for Local  
812 Adaptation: Inference of a Null Model through Trimming the Distribution of FST. *The*  
813 *American Naturalist* 186:S24–S36. DOI: 10.1086/682949.

814 Wickham H. 2016. *ggplot2: Elegant Graphics for Data Analysis*. Springer-Verlag, New  
815 York. ISBN 978-3-319-24277-4.

816 Wilcove DS, Wikelski M. 2008. Going, going, gone: Is animal migration disappearing? *PLoS*  
817 *Biology* 6:1361–1364. DOI: 10.1371/journal.pbio.0060188.

818 Wilson RW, Wilson JM, Grosell M. 2002. Intestinal bicarbonate secretion by marine teleost  
819 fish—why and how? *Biochimica et Biophysica Acta (BBA) - Biomembranes* 1566:182–  
820 193. DOI: [https://doi.org/10.1016/S0005-2736\(02\)00600-4](https://doi.org/10.1016/S0005-2736(02)00600-4).

821 Wittmann MJ, Bergland AO, Feldman MW, Schmidt PS, Petrov DA. 2017. Seasonally  
822 fluctuating selection can maintain polymorphism at many loci via segregation lift.  
823 *Proceedings of the National Academy of Sciences* 114:E9932–E9941. DOI:  
824 10.1073/pnas.1702994114.

825 Zhu H, Gegear RJ, Casselman A, Kanginakudru S, Reppert SM. 2009. Defining behavioral  
826 and molecular differences between summer and migratory monarch butterflies. *BMC*

827  
828

*Biology* 7:14. DOI: 10.1186/1741-7007-7-14.
